# Supplementary material
Source: PubMed Central journal article supplement (PMC7940578)
Supplement: NIHMS1654666-supplement-Supplemental_Material_Tables_Descriptive_and_Sensitivity_Analyses.pdf [file NIHMS1654666-supplement-Supplemental_Material_Tables_Descriptive_and_Sensitivity_Analyses.pdf]

## SUPPLEMENTAL MATERIALS

**Supplemental Table I.** Comparison of Pre-pregnancy Characteristics for Parous Women with Post-baseline Births Excluded versus Included in the Analysis.

| Pre-pregnancy Characteristics<br>Mean (SD) † or N (%) | Excluded<br>(N=259) | Included<br>(N=1133) | p-value |
|-------------------------------------------------------|---------------------|----------------------|---------|
| Age at first post-baseline birth, years               | 28.9 (5.3)          | 30.1 (4.9)           | <.001   |
| Black race, n (%)                                     | 157 (61)            | 551 (49)             | <.001   |
| Education, n (%)                                      |                     |                      | 0.02    |
| High school or less                                   | 86 (33)             | 289 (26)             |         |
| College education                                     | 133 (51)            | 610 (54)             |         |
| Graduate or professional degree                       | 40 (15)             | 234 (21)             |         |
| BMI, kg/m <sup>2</sup>                                | 25.3 (6.6)          | 24.9 (5.6)           | 0.29    |
| Waist circumference, cm                               | 76.2 (13.5)         | 75.4 (11.8)          | 0.33    |
| Systolic BP, mm Hg                                    | 104 (10)            | 104 (10)             | 0.77    |
| Diastolic BP, mm Hg                                   | 65 (9)              | 66 (10)              | 0.20    |
| Total cholesterol, mg/dL                              | 175 (36)            | 180 (35)             | 0.07    |
| LDL-cholesterol, mg/dL                                | 104 (32)            | 107 (31)             | 0.10    |
| HDL-cholesterol, mg/dL                                | 57 (14)             | 58 (14)              | 0.42    |
| Fasting Triglycerides, mg/dL †                        | 62 (45, 86)         | 60 (44, 84)          | 0.27    |
| Fasting glucose, mg/dL                                | 81 (10)             | 81 (8)               | 0.31    |
| Fasting insulin, µU/mL †                              | 10.0 (7.2, 13.6)    | 9.5 (6.5, 13.6)      | 0.06    |
| HOMA-IR †                                             | 2.0 (1.4, 2.8)      | 1.8 (1.3, 2.7)       | 0.03    |

Abbreviations: BMI, body mass index; BP, blood pressure; HDL-cholesterol, high-density lipoprotein cholesterol; HOMA-IR, homeostatic model assessment of insulin resistance; LDL-cholesterol, low-density lipoprotein cholesterol; SD, standard deviation.

Based on data from the pre-pregnancy measurements from closest exam preceding the first post-baseline birth, and Age at the first post-baseline birth.

† Median (25th, 75th percentiles)

**Supplemental Table II.** Number (%) of Women among Categories of CAC Scores at the End of Follow Up, and at Each CARDIA Exam Year (Years 15, 20 and 25).

| <b>CAC Measures</b><br>N, women | <b>At the End of Follow Up *</b><br>1,133 | <b>At Year 15</b><br>838 | <b>At Year 20</b><br>906 | <b>At Year 25</b><br>948 | <b>p-value †</b> |
|---------------------------------|-------------------------------------------|--------------------------|--------------------------|--------------------------|------------------|
| Categories of CAC scores, n (%) |                                           |                          |                          |                          | <.001            |
| CAC = 0                         | 950 (83.9)                                | 805 (96.1)               | 818 (90.3)               | 806 (85.0)               |                  |
| CAC >0 to 10                    | 94 (8.3)                                  | 13 (1.6)                 | 45 (5.0)                 | 42 (4.4)                 |                  |
| CAC >10 to 50                   | 50 (4.4)                                  | 10 (1.2)                 | 23 (2.5)                 | 42 (4.4)                 |                  |
| CAC >50 to 99                   | 23 (2.0)                                  | 4 (0.5)                  | 10 (1.1)                 | 23 (2.4)                 |                  |
| CAC ≥ 100                       | 16 (1.4)                                  | 6 (0.7)                  | 10 (1.1)                 | 35 (3.7)                 |                  |
| CAC score >0                    |                                           |                          |                          |                          |                  |
| Frequency, n (%)                | 183 (16.2)                                | 33 (3.9)                 | 88 (9.7)                 | 142 (15.0)               | <.001            |
| Geometric Mean (95%CI)          | 11.3 (9.0, 14.1)                          | 19.3 (11.3, 33.0)        | 11.1 (7.7, 15.9)         | 28.7 (21.8, 37.7)        | <.001            |

\* The distribution of CAC scores is based on the CAC measure at the end of follow up (last exam with a CAC measurement, or the 1st exam with a CAC score >0).

CAC, coronary artery calcium;

† Compared the distribution of CAC at Years 15, 20, and 25, using chi-square test or Kruskal-Wallis test.

**Supplemental Table III.** Pre-pregnancy (1985-2006) and End of Follow Up Characteristics Associated with Coronary Artery Calcium (CAC) Status (2000-2011) among 1,133 CARDIA Women.

| Variables                           | Pre-pregnancy Characteristics |                   |         | End of Follow Up Characteristics |                   |         |
|-------------------------------------|-------------------------------|-------------------|---------|----------------------------------|-------------------|---------|
|                                     | Any CAC<br>(N=183)            | No CAC<br>(N=950) | p-value | Any CAC<br>(N=183)               | No CAC<br>(N=950) | p-value |
| Mean (SD) † or N (%)                |                               |                   |         |                                  |                   |         |
| Age, years *                        | 30.4 (5.0)                    | 30.0 (4.9)        | 0.36    | 46.4 (5.2)                       | 47.9 (4.7)        | <.001   |
| Black, n (%)                        | 95 (52)                       | 456 (48)          | 0.33    | 95 (52)                          | 456 (48)          | 0.33    |
| Education, n (%)                    |                               |                   | 0.96    |                                  |                   | 0.70    |
| High school or less                 | 48 (26)                       | 241 (25)          |         | 28 (15)                          | 126 (13)          |         |
| College education                   | 97 (53)                       | 513 (54)          |         | 101 (55)                         | 523 (55)          |         |
| Graduate or professional            | 38 (21)                       | 196 (21)          |         | 54 (30)                          | 301 (32)          |         |
| Weight Status, n (%)                |                               |                   | <.001   |                                  |                   | 0.01    |
| Normal (BMI <25)                    | 88 (48)                       | 630 (66)          |         | 43 (24)                          | 306 (32)          |         |
| Overweight (BMI: 25-29.9)           | 42 (23)                       | 179 (19)          |         | 44 (24)                          | 254 (27)          |         |
| Obese (BMI ≥30)                     | 53 (29)                       | 141 (15)          |         | 96 (52)                          | 390 (41)          |         |
| BMI, kg/m <sup>2</sup>              | 26.9 (7.0)                    | 24.5 (5.2)        | <.001   | 31.7 (8.5)                       | 29.5 (7.2)        | <.001   |
| Waist circumference, cm             | 80.1 (15.2)                   | 74.5 (10.8)       | <.001   | 93.9 (18.7)                      | 88.0 (15.0)       | <.001   |
| Systolic BP, mm Hg                  | 107 (11)                      | 104 (9)           | <.001   | 118 (17)                         | 116 (17)          | 0.08    |
| Diastolic BP, mm Hg                 | 68 (10)                       | 65 (10)           | 0.003   | 75 (11)                          | 73 (12)           | 0.06    |
| Total cholesterol, mg/dL            | 187 (42)                      | 178 (34)          | 0.002   | 193 (35)                         | 191 (35)          | 0.43    |
| LDL-cholesterol, mg/dL              | 115 (37)                      | 106 (30)          | <.001   | 114 (31)                         | 109 (30)          | 0.04    |
| HDL-cholesterol, mg/dL              | 55 (13)                       | 59 (14)           | 0.004   | 57 (18)                          | 62 (18)           | <.001   |
| Fasting Triglycerides, mg/dL †      | 64 (49, 97)                   | 59 (43, 80)       | <.001   | 94 (64, 134)                     | 79 (61, 114)      | 0.01    |
| Fasting serum glucose, mg/dL        | 82 (9)                        | 80 (8)            | 0.02    | 96 (27)                          | 94 (21)           | 0.18    |
| Fasting insulin, μU/mL †            | 11.0 (7.0, 15.7)              | 9.2 (6.4, 13.0)   | 0.001   | 12.0 (8.0, 19.0)                 | 9.0 (5.7, 14.1)   | <.001   |
| HOMA-IR †                           | 2.1 (1.3, 3.1)                | 1.8 (1.2, 2.6)    | 0.004   | 2.7 (1.7, 4.4)                   | 2.0 (1.2, 3.3)    | <.001   |
| Metabolic Syndrome, n (%)           | 13 (7)                        | 18 (2)            | <.001   | 73 (40)                          | 245 (26)          | <.001   |
| hs-CRP, μg/mL †                     | --                            | --                | --      | 2.1 (0.8, 5.4)                   | 1.5 (0.5, 4.2)    | 0.007   |
| hs-CRP (>3 μg/mL), n (%)            | --                            | --                | --      | 71 (40)                          | 308 (33)          | 0.08    |
| Hypertension, n (%)                 | 15 (8)                        | 21 (2)            | <.001   | 79 (43)                          | 248 (26)          | <.001   |
| Lipid-lowering medication, n (%)    | 0                             | 1 (0.1)           | 1.00    | 25 (14)                          | 86 (9)            | 0.055   |
| Glucose tolerance status, n (%)     |                               |                   | 0.30    |                                  |                   | 0.004   |
| Normoglycemic                       | 176 (96)                      | 928 (98)          |         | 87 (48)                          | 523 (55)          |         |
| Prediabetes                         | 7 (4)                         | 22 (2)            |         | 63 (34)                          | 335 (35)          |         |
| Incident diabetes                   | 0                             | 0                 |         | 33 (18)                          | 92 (10)           |         |
| Physical activity score †           | 261 (154, 434)                | 253 (122, 436)    | 0.31    | 210 (98, 418)                    | 224 (101, 426)    | 0.65    |
| Smoking, lifetime pack-years        | 3.3 (5.4)                     | 1.9 (4.2)         | <.001   | 5.7 (8.4)                        | 3.3 (7.4)         | <.001   |
| A priori diet quality score ‡       | 65 (13)                       | 64 (14)           | 0.44    | 67 (11)                          | 67 (12)           | 0.89    |
| Family history of diabetes, n (%)   | 26 (14)                       | 141 (15)          | 0.86    | 81 (45)                          | 424 (45)          | 0.97    |
| Family history heart disease, n (%) | 39 (22)                       | 153 (16)          | 0.07    | 106 (58)                         | 508 (54)          | 0.24    |
| Oral contraceptive use, n (%)       | 164 (90)                      | 841 (89)          | 0.67    | 177 (97)                         | 896 (94)          | 0.21    |
| Menopausal hormone therapy, n (%)   | --                            | --                | --      | 63 (7)                           | 10 (5)            | 0.56    |
| Parity, n (%)                       |                               |                   | 0.49    |                                  |                   | 0.49    |
| Nulliparous                         | 122 (67)                      | 660 (69)          |         | --                               | --                |         |
| One                                 | 42 (23)                       | 182 (19)          |         | 39 (21)                          | 225 (24)          |         |
| Two or more                         | 19 (10)                       | 108 (11)          |         | 144 (79)                         | 725 (76)          |         |

| Variables                                 | Pre-pregnancy Characteristics |                   |             | End of Follow Up Characteristics |                   |             |
|-------------------------------------------|-------------------------------|-------------------|-------------|----------------------------------|-------------------|-------------|
|                                           | Any CAC<br>(N=183)            | No CAC<br>(N=950) | p-<br>value | Any CAC<br>(N=183)               | No CAC<br>(N=950) | p-<br>value |
| Mean (SD) † or N (%)                      |                               |                   |             |                                  |                   |             |
| GD Pregnancy, n (%)                       | 0 (0)                         | 3 (0.3)           | 1.00        | 34 (19)                          | 105 (11)          | 0.005       |
| Hypertensive disorder of pregnancy, n (%) | --                            | --                | --          | 49 (27)                          | 193 (20)          | 0.051       |
| Preterm birth, n (%)                      | --                            | --                | --          | 51 (28)                          | 234 (25)          | 0.36        |
| Time since last birth, years              | --                            | --                | --          | 13.1 (5.9)                       | 15.0 (5.8)        | <.001       |
| Post-menopausal status, n (%)             | --                            | --                | --          | 63 (34)                          | 327 (34)          | 1.00        |
| Weight change, kg                         | --                            | --                | --          | 13.2 (15.4)                      | 13.5 (13.3)       | 0.76        |

Abbreviations: BMI, body mass index; BP, blood pressure; CAC, coronary artery calcium; GD, gestational diabetes; HDL-cholesterol, high-density lipoprotein cholesterol; HOMA-IR, homeostatic model assessment of insulin resistance; hs-CRP, high sensitivity C-reactive protein; LDL-cholesterol, low-density lipoprotein cholesterol; SD, standard deviation.

† Median (25th, 75th percentiles)

\* For beginning of follow up: Age at the first post-baseline birth; and At follow up: Age at the end of follow up.

‡ Prior to first post-baseline birth: based on baseline *a priori* diet quality score (Year 0); At follow up: based on the average of *a priori* diet quality scores from exams (Years 0, 7, and 20).

Of 1133 women, 15 women were missing a hs-CRP measurement at the end of follow up.

**Supplemental Table IV.** Adjusted Hazard Ratios (HR) and (95%CI) of Any CAC (score>0) Associated with GD Status and Subsequent Glucose Tolerance Groups After Pregnancy (normoglycemia, prediabetes or incident diabetes) in Women with Adjustment for HDP, or Exclusion of Women with HDP (No HDP).

| Exposure Groups                                       | Entire sample (N=1133) |            |              |                  |              | Samples with No HDP (N=891) |            |              |
|-------------------------------------------------------|------------------------|------------|--------------|------------------|--------------|-----------------------------|------------|--------------|
|                                                       | % Any CAC<br>(n/N)†    | HR (95%CI) |              | Adjusted for HDP |              | % Any CAC<br>(n/N)†         | HR (95%CI) |              |
| <b>GD Status</b>                                      |                        |            |              |                  |              |                             |            |              |
| No GD                                                 | 15.0 (149/994)         | 1          | Referent     | 1                | Referent     | 14.1 (112/793)              | 1          | Referent     |
| GD                                                    | 24.5 (34/139)          | 1.66       | (1.13, 2.43) | 1.67             | (1.14, 2.44) | 22.5 (22/98)                | 1.71       | (1.08, 2.73) |
| <b>Incident Diabetes by GD Status</b>                 |                        |            |              |                  |              |                             |            |              |
| Incident diabetes                                     |                        |            |              |                  |              |                             |            |              |
| No GD                                                 | 27.0 (24/89)           | 1          | Referent     | 1                | Referent     | 26.2 (16/61)                | 1          | Referent     |
| GD                                                    | 25.0 (9/36)            | 1.03       | (0.45, 2.33) | 1.08             | (0.46, 2.49) | 22.7 (5/22)                 | 1.18       | (0.36, 3.90) |
| No diabetes                                           |                        |            |              |                  |              |                             |            |              |
| No GD                                                 | 13.8 (125/905)         | 1          | Referent     | 1                | Referent     | 13.1 (96/732)               | 1          | Referent     |
| GD                                                    | 24.3 (25/103)          | 1.95       | (1.27, 3.01) | 1.95             | (1.27, 3.01) | 22.4 (17/76)                | 1.83       | (1.09, 3.08) |
| <b>GD and Transitions in Glucose Tolerance Groups</b> |                        |            |              |                  |              |                             |            |              |
| No GD/Normoglycemia                                   | 12.9 (72/557)          | 1          | Referent     | 1                | Referent     | 12.4 (57/459)               | 1          | Referent     |
| No GD/Prediabetes                                     | 15.2 (53/348)          | 1.5        | (1.03, 2.17) | 1.49             | (1.03, 2.17) | 14.3 (39/273)               | 1.41       | (0.92, 2.18) |
| No GD/Incident diabetes                               | 27.0 (24/89)           | 1.79       | (1.06, 3.01) | 1.78             | (1.06, 3.01) | 26.2 (16/61)                | 1.92       | (1.02, 3.63) |
| GD/Normoglycemia                                      | 28.3 (15/53)           | 2.24       | (1.28, 3.92) | 2.25             | (1.28, 3.93) | 25.6 (10/39)                | 2.04       | (1.04, 4.00) |
| GD/Prediabetes                                        | 20.0 (10/50)           | 2.08       | (1.06, 4.07) | 2.08             | (1.06, 4.08) | 18.9 (7/37)                 | 2.06       | (0.92, 4.60) |
| GD/Incident diabetes                                  | 25.0 (9/36)            | 1.76       | (0.85, 3.67) | 1.77             | (0.85, 3.70) | 22.7 (5/22)                 | 2.09       | (0.81, 5.41) |

All models adjusted for race, age at the first birth and pre-pregnancy systolic blood pressure (BP) and Body Mass Index (BMI), and time-varying lifetime smoking exposure (pack-years) and time-varying hypertension status during follow up. Additional adjustment for a history of hypertensive disorders of pregnancy (HDP) (ever/never).

Abbreviations: BMI, body mass index; BP, blood pressure; CAC, coronary artery calcium; GD, gestational diabetes; 95%CI, 95% Confidence Interval; HDP, hypertensive disorders of pregnancy.

The sensitivity analysis excludes women with self-report of hypertensive disorders of pregnancy (HDP).

†At the end of follow up

**Supplemental Table V. Sensitivity Analysis among Nulliparas:** Adjusted Hazard Ratios (HR) and 95% Confidence Interval (95%CI) of Any CAC Associated with GD Status and Subsequent Glucose Tolerance Groups (normoglycemia, prediabetes or incident diabetes) in Women. Additional adjustment for hypertensive disorders of pregnancy (HDP) (ever/never); and Analysis of the sample of Nulliparas with No HDP.

| Exposure Groups                                          | Nulliparas at baseline (N=782) |            |              |                  |              | Nulliparas with No HDP (N=612) |            |              |
|----------------------------------------------------------|--------------------------------|------------|--------------|------------------|--------------|--------------------------------|------------|--------------|
|                                                          | % Any CAC (n/N)†               | HR (95%CI) |              | Adjusted for HDP |              | % Any CAC (n/N)†               | HR (95%CI) |              |
| <b><u>GD Status</u></b>                                  |                                |            |              |                  |              |                                |            |              |
| No GD                                                    | 14.4 (99/689)                  | 1          | Referent     | 1                | Referent     | 13.7 (75/546)                  | 1          | Referent     |
| GD                                                       | 24.7 (23/93)                   | 1.72       | (1.08, 2.73) | 1.74             | (1.09, 2.78) | 24.2 (16/66)                   | 2.04       | (1.19, 3.52) |
| <b><u>Incident Diabetes by GD Status</u></b>             |                                |            |              |                  |              |                                |            |              |
| Incident diabetes                                        |                                |            |              |                  |              |                                |            |              |
| No GD                                                    | 24.5 (12/49)                   | 1          | Referent     | 1                | Referent     | 26.5 (9/34)                    | 1          | Referent     |
| GD                                                       | 29.2 (7/24)                    | 1.31       | (0.48, 3.58) | 1.60             | (0.54, 4.72) | 30.8 (4/13)                    | 1.90       | (0.45, 8.01) |
| No diabetes                                              |                                |            |              |                  |              |                                |            |              |
| Non-GD                                                   | 13.6 (87/640)                  | 1          | Referent     | 1                | Referent     | 12.9 (66/512)                  | 1          | Referent     |
| GD                                                       | 23.2 (16/69)                   | 2.05       | (1.20, 3.51) | 2.05             | (1.2, 3.51)  | 22.6 (12/53)                   | 1.98       | (1.06, 3.67) |
| <b><u>GD and Subsequent Glucose Tolerance Groups</u></b> |                                |            |              |                  |              |                                |            |              |
| No GD/Normoglycemia                                      | 12.1 (49/405)                  | 1          | Referent     | 1                | Referent     | 11.6 (39/336)                  | 1          | Referent     |
| No GD/Prediabetes                                        | 16.2 (38/235)                  | 1.64       | (1.05, 2.58) | 1.64             | (1.05, 2.58) | 15.3 (27/176)                  | 1.54       | (0.91, 2.60) |
| No GD/Incident diabetes                                  | 24.5 (12/49)                   | 1.58       | (0.78, 3.22) | 1.59             | (0.78, 3.22) | 26.5 (9/34)                    | 1.84       | (0.81, 4.19) |
| GD/Normoglycemia                                         | 27.8 (10/36)                   | 2.40       | (1.21, 4.77) | 2.41             | (1.21, 4.78) | 25.0 (7/28)                    | 2.20       | (0.98, 4.93) |
| GD/Prediabetes                                           | 18.2 (6/33)                    | 2.04       | (0.86, 4.81) | 2.05             | (0.87, 4.85) | 20.0 (5/25)                    | 2.48       | (0.96, 6.44) |
| GD/Incident diabetes                                     | 29.2 (7/24)                    | 1.97       | (0.83, 4.69) | 2.02             | (0.84, 4.86) | 30.8 (4/13)                    | 3.27       | (1.11, 9.62) |

All models adjusted for race, age at the first birth, pre-pregnancy systolic BP and BMI, and time-varying lifetime smoking exposure (pack years) and time-varying hypertension status during follow up. Additional adjustment for a history of hypertensive disorders of pregnancy (HDP) (ever/never).

Abbreviations: BMI, body mass index; BP, blood pressure; CAC, coronary artery calcium; GD, gestational diabetes; 95%CI, 95% Confidence Interval; HDP, hypertensive disorders of pregnancy.

† At the end of follow up
